# Supplementary material for: Neoadjuvant cisplatin and fluorouracil versus epirubicin, cisplatin, and capecitabine followed by resection in patients with oesophageal adenocarcinoma (UK MRC OE05): an open-label, randomised phase 3 trial
Source: PubMed Central journal article supplement (PMC5585417; doi:10.1016/s1470-2045(17)30447-3), 2017-09
Supplement: mmc1.pdf [file mmc1.pdf]

# THE LANCET Oncology

## Supplementary appendix

This appendix formed part of the original submission and has been peer reviewed. We post it as supplied by the authors.

Supplement to: Alderson D, Cunningham D, Nankivell M, et al. Neoadjuvant cisplatin and fluorouracil versus epirubicin, cisplatin, and capecitabine followed by resection in patients with oesophageal adenocarcinoma (UK MRC OE05): an open-label, randomised phase 3 trial. *Lancet Oncol* 2017; published online August 4. [http://dx.doi.org/10.1016/S1470-2045\(17\)30447-3](http://dx.doi.org/10.1016/S1470-2045(17)30447-3).

**A randomised trial comparing neoadjuvant cisplatin/5-FU with  
epirubicin/cisplatin/capecitabine followed by resection for oesophageal  
adenocarcinoma. Results from the UK Medical Research Council OE05  
randomised clinical trial**

**Supplementary material**

**Acknowledgements**

**Trial Management Group:**

Derek Alderson; Jane Blazeby; Adrian Crellin; David Cunningham; Heike Grabsch; Mike Griffin.

**CTU MRC at UCL staff:**

Elizabeth Armstrong; Julie Bakobaki; Claire Chandler; Christina Chung; Paul Cortissos; Carlos Diaz; Alexandra Enston; Laura Farrelly; Cindy Goldstein; Lynda Harper; Brooke Jackson; Sarah Kirk; Ruth Langley; Linda Ly; Leah Meaden; Matthew Nankivell; Laura Nichols; Dipa Noor; Sabrina Patel; Helen Pearce; Jennifer Pickard; Claire Robb; Sally Stenning; Monique Tomiczek; Barbara Uscinska; Monica Verma; Simon Weeden.

**Independent Data Monitoring Committee:**

John Bancewitz; Pippa Corrie; Janet Dunn; Mike Hallissey.

**Trial Steering Committee:**

Peter Johnson; Philip Johnson; Malcolm Mason; Chris Parker; Robin Rudd; Jeremy Whelan.

**Other advisors/collaborators:**

Rupert Langer; Alicia Okines; Susan Pritchard; Elizabeth Smyth;

**Additional funding:**

David Cunningham receives funding from The National Institute of Health Biomedical Centre at the Institute of Research and Royal Marsden Hospital.

Jane Blazeby receives funding from the Medical Research Council ConDuCT-II Hub for Trials Methodology Research at the University of Bristol.

## Randomising centres

| Centre                                        | Principal Investigator |    |              | #Patients |
|-----------------------------------------------|------------------------|----|--------------|-----------|
|                                               |                        |    |              |           |
| Bristol Haematology & Oncology Centre         | Dr                     | S  | Falk         | 74        |
| St James's University Hospital                | Dr                     | AM | Crellin      | 50        |
| Freeman Hospital + Newcastle General Hospital | Dr                     | FY | Coxon        | 45        |
| Heartlands Hospital                           | Dr                     | J  | Thompson     | 43        |
| Royal Marsden Hospital (Sutton + London)      | Prof                   | D  | Cunningham   | 37        |
| Yeovil District Hospital                      | Dr                     | E  | Beaumont     | 34        |
| Royal United Hospital                         | Mr                     | R  | Krysztopik   | 30        |
| Guy's Hospital                                | Dr                     | P  | Ross         | 28        |
| Queen Elizabeth Hospital                      | Dr                     | D  | Peake        | 28        |
| Huddersfield Royal Infirmary                  | Dr                     | J  | Dent         | 27        |
| Maidstone Hospital                            | Dr                     | J  | Waters       | 23        |
| Western General Hospital                      | Dr                     | H  | Phillips     | 23        |
| Royal Surrey County Hospital                  | Dr                     | S  | Cummins      | 21        |
| Leicester Royal Infirmary                     | Dr                     | A  | Thomas       | 19        |
| Peterborough City Hospital                    | Dr                     | K  | McAdam       | 19        |
| Queen Alexandra Hospital                      | Dr                     | C  | Archer       | 18        |
| Addenbrooke's Hospital                        | Dr                     | H  | Ford         | 17        |
| Cheltenham General Hospital                   | Dr                     | S  | Elyan        | 17        |
| Queens Hospital                               | Mr                     | D  | Khoo         | 17        |
| St Bartholomew's Hospital                     | Dr                     | S  | Slater       | 16        |
| University Hospital Coventry                  | Dr                     | S  | Sothi        | 16        |
| Cumberland Infirmary                          | Dr                     | J  | Nicoll       | 15        |
| Dorset County Hospital                        | Dr                     | M  | Bayne        | 15        |
| Princess Alexandra Hospital                   | Dr                     | J  | Bridgewater  | 15        |
| Weston Park Hospital                          | Dr                     | J  | Wadsley      | 15        |
| Royal Cornwall Hospital (Treliske)            | Dr                     | R  | Ellis        | 14        |
| Royal Bournemouth General Hospital            | Dr                     | T  | Geldart      | 13        |
| Velindre Hospital                             | Dr                     | T  | Crosby       | 13        |
| Churchill Hospital                            | Dr                     | N  | Warner       | 12        |
| Royal Blackburn Hospital                      | Dr                     | W  | Appel        | 11        |
| University Hospital of North Staffordshire    | Dr                     | A  | Jamil        | 11        |
| Bradford Royal Infirmary                      | Dr                     | S  | Cheeseman    | 9         |
| Musgrove Park Hospital                        | Dr                     | E  | Cattell      | 9         |
| Aintree Hospitals Trust                       | Dr                     | H  | Neville-Webb | 8         |
| Clatterbridge Centre for Oncology             | Dr                     | A  | Moss         | 8         |
| Torbay District General Hospital              | Dr                     | N  | Dorey        | 8         |
| University College London                     | Dr                     | D  | Hochhauser   | 8         |
| Derbyshire Royal Infirmary                    | Dr                     | RB | Kulkarni     | 7         |
| Derriford Hospital                            | Dr                     | S  | Pascoe       | 7         |
| Great Western Hospital                        | Dr                     | C  | Blessing     | 6         |
| Kent and Canterbury Hospital                  | Dr                     | J  | Waters       | 6         |

| Centre                                  | Principal Investigator |    |               | #Patients |
|-----------------------------------------|------------------------|----|---------------|-----------|
| Worcestershire Royal Hospital           | Dr                     | C  | Candish       | 6         |
| Glan Clwyd Hospital                     | Dr                     | A  | Garcia-Alonso | 5         |
| Good Hope Hospital                      | Dr                     | J  | Glaholm       | 5         |
| Royal Devon & Exeter (Wonford) Hospital | Dr                     | E  | Toy           | 5         |
| The Alexandra Hospital                  | Dr                     | S  | Sothi         | 5         |
| Broomfield Hospital                     | Dr                     | S  | Tahir         | 4         |
| St Mary's Hospital (London)             | Dr                     | D  | Power         | 4         |
| Weston General Hospital                 | Dr                     | S  | Hilman        | 4         |
| York District Hospital                  | Dr                     | K  | Last          | 4         |
| Burnley General Hospital                | Dr                     | W  | Appel         | 3         |
| Countess of Chester Hospital            | Mr                     | D  | Monk          | 3         |
| Hereford County Hospital                | Dr                     | N  | Reed          | 3         |
| North Middlesex Hospital                | Dr                     | J  | Bridgewater   | 3         |
| Poole General Hospital                  | Dr                     | V  | Laurence      | 3         |
| Royal Derby Hospital                    | Dr                     | RB | Kulkarni      | 3         |
| Royal Free Hospital                     | Dr                     | T  | Meyer         | 3         |
| Royal Lancaster Infirmary               | Dr                     | D  | Fyfe          | 3         |
| Royal Preston Hospital                  | Dr                     | E  | Young         | 3         |
| St George's Hospital                    | Dr                     | T  | Benepal       | 3         |
| Victoria Hospital                       | Dr                     | S  | Susnerwala    | 3         |
| Furness General Hospital                | Dr                     | D  | Fyfe          | 2         |
| Whiston Hospital                        | Dr                     | E  | Marshall      | 2         |
| Ysbyty Gwynedd                          | Prof.                  | N  | Stuart        | 2         |
| Darent Valley Hospital                  | Dr                     | R  | Shah          | 1         |
| James Cook University Hospital          | Dr                     | N  | Wadd          | 1         |
| King George Hospital                    | Mr                     | D  | Khoo          | 1         |
| William Harvey Hospital                 | Dr                     | J  | Waters        | 1         |

**Supplementary Table S1 CT staging information**

| Data                          |                                    | <u>CF</u><br>N=450 |         | <u>ECX</u><br>N=446 |         | <u>Total</u><br>N=896 |         |
|-------------------------------|------------------------------------|--------------------|---------|---------------------|---------|-----------------------|---------|
|                               |                                    | N                  | %       | N                   | %       | N                     | %       |
| CT length of tumour (cm)      | <b>Median (IQR)</b>                | 5                  | (3.4-6) | 5                   | (3.5-6) | 5                     | (3.5-6) |
|                               | <b>Min – Max</b>                   | 0–14.7             |         | 0-16                |         | 0-16                  |         |
|                               | <i>Missing</i>                     | 119                | 26%     | 125                 | 28%     | 244                   | 27%     |
| Extent of disease             | <b>T1-T3</b>                       | 416                | 92%     | 414                 | 93%     | 830                   | 93%     |
|                               | <b>T4</b>                          | 11                 | 2%      | 8                   | 2%      | 19                    | 2%      |
|                               | <i>Missing</i>                     | 23                 | 5%      | 24                  | 5%      | 47                    | 5%      |
| CT designated malignant nodes | <b>None</b>                        | 223                | 50%     | 225                 | 50%     | 448                   | 50%     |
|                               | <b>Mediastinal</b>                 | 87                 | 19%     | 77                  | 17%     | 164                   | 18%     |
|                               | <b>Abdominal</b>                   | 82                 | 18%     | 78                  | 17%     | 160                   | 18%     |
|                               | <b>Mediastinal &amp; Abdominal</b> | 49                 | 11%     | 50                  | 11%     | 99                    | 11%     |
|                               | <i>Missing</i>                     | 9                  | 2%      | 16                  | 4%      | 25                    | 3%      |

Note: One CF patient withdrew consent before providing any on-study staging information, and is not included in the above table.

**Supplementary Table S2 EUS staging information**

| Data                              |                      | <u>CF</u><br>N=450 |       | <u>ECX</u><br>N=446 |       | <u>Total</u><br>N=896 |       |
|-----------------------------------|----------------------|--------------------|-------|---------------------|-------|-----------------------|-------|
|                                   |                      | N                  | %     | N                   | %     | N                     | %     |
| EUS overall length of tumour (cm) | <b>Median (IQR)</b>  | 5                  | (4-7) | 5                   | (4-7) | 5                     | (4-7) |
|                                   | <b>Min – Max</b>     | 0.5-15             |       | 0.5-16              |       | 0.5-16                |       |
|                                   | <b>Missing</b>       | 52                 | 12%   | 49                  | 11%   | 101                   | 12%   |
| EUS oesophageal involvement (cm)  | <b>Median (IQR)</b>  | 5                  | (3-6) | 5                   | (3-6) | 5                     | (3-6) |
|                                   | <b>Min – Max</b>     | 0-15               |       | 0.4-16              |       | 0-16                  |       |
|                                   | <b>Missing</b>       | 90                 | 21%   | 97                  | 22%   | 187                   | 22%   |
| EUS Gastric involvement (cm)      | <b>Median (IQR)</b>  | 0                  | (0-0) | 0                   | (0-0) | 0                     | (0-0) |
|                                   | <b>Min – Max</b>     | 0-6                |       | 0-6                 |       | 0-6                   |       |
|                                   | <b>Missing</b>       | 97                 | 21%   | 92                  | 21%   | 189                   | 21%   |
| Extent of disease                 | <b>T1</b>            | 3                  | 1%    | 5                   | 1%    | 8                     | 1%    |
|                                   | <b>T2</b>            | 50                 | 11%   | 41                  | 9%    | 91                    | 10%   |
|                                   | <b>T3</b>            | 374                | 83%   | 382                 | 86%   | 756                   | 84%   |
|                                   | <b>T4</b>            | 13                 | 3%    | 12                  | 3%    | 25                    | 3%    |
|                                   | <b>Missing</b>       | 10                 | 2%    | 6                   | 1%    | 16                    | 2%    |
| EUS designated malignant nodes    | <b>None</b>          | 152                | 34%   | 158                 | 35%   | 310                   | 35%   |
|                                   | <b>Mediastinal</b>   | 92                 | 20%   | 97                  | 22%   | 189                   | 21%   |
|                                   | <b>Abdominal</b>     | 116                | 26%   | 114                 | 26%   | 230                   | 26%   |
|                                   | <b>Med &amp; Abd</b> | 63                 | 14%   | 55                  | 12%   | 118                   | 13%   |
|                                   | <b>Missing</b>       | 27                 | 6%    | 22                  | 5%    | 49                    | 5%    |

Note: One CF patient withdrew consent before providing any on-study staging information, and is not included in the above table.

**Supplementary Table S3 Other staging procedures (all patients received CT and EUS)**

| Data                                          | <u>CF</u><br>N=450 |     | <u>ECX</u><br>N=446 |     | <u>Total</u><br>N=896 |     |
|-----------------------------------------------|--------------------|-----|---------------------|-----|-----------------------|-----|
|                                               | N                  | %   | N                   | %   | N                     | %   |
| <b>Laparoscopy performed</b>                  | 216                | 48% | 213                 | 48% | 429                   | 48% |
| <b>PET scan performed</b>                     | 271                | 60% | 270                 | 61% | 541                   | 60% |
| <b>Bone scan performed</b>                    | 23                 | 5%  | 25                  | 6%  | 48                    | 5%  |
| <b>Other staging investigations performed</b> | 37                 | 8%  | 33                  | 7%  | 70                    | 8%  |

Note: One CF patient withdrew consent before providing any on-study staging information, and is not included in the above table.

**Supplementary Table S4 Grade 3/4/5 Chemotherapy toxicity**

| Data                                     | CF – 2 cycles<br>N=446 |     | ECX – 4 cycles<br>N=441 |     | Total<br>N=887 |     | P-value for<br>difference |
|------------------------------------------|------------------------|-----|-------------------------|-----|----------------|-----|---------------------------|
|                                          | N                      | %   | N                       | %   | N              | %   |                           |
| <b>Any grade 3/4/5 toxicity</b>          | 140                    | 31% | 218                     | 49% | 358            | 40% | <0.0001                   |
| <b>Neutropenia</b>                       | 74                     | 17% | 101                     | 23% | 175            | 20% | 0.023                     |
| <b>DVT/PE</b>                            | 19                     | 4%  | 30                      | 7%  | 49             | 6%  | 0.11                      |
| <b>Vomiting</b>                          | 20                     | 4%  | 26                      | 6%  | 46             | 5%  | 0.37                      |
| <b>Nausea</b>                            | 16                     | 4%  | 27                      | 6%  | 43             | 5%  | 0.087                     |
| <b>Diarrhoea</b>                         | 6                      | 1%  | 36                      | 8%  | 42             | 5%  | <0.0001                   |
| <b>Plantar-palmar erythrodysesthesia</b> | 0                      | 0%  | 38                      | 9%  | 38             | 4%  | <0.0001                   |
| <b>Stomatitis</b>                        | 25                     | 6%  | 7                       | 2%  | 32             | 4%  | 0.0018                    |
| <b>Infection/febrile neutropenia</b>     | 3                      | 1%  | 14                      | 3%  | 17             | 2%  | 0.0067                    |
| <b>Cardiac toxicity</b>                  | 4                      | 1%  | 3                       | 1%  | 7              | 1%  | 1.00                      |
| <b>Peripheral neuropathy</b>             | 1                      | <1% | 3                       | 1%  | 4              | <1% | 0.62                      |
| <b>Loss of taste</b>                     | 2                      | <1% | 1                       | <1% | 3              | <1% | 1.00                      |
| <b>Thrombocytopenia</b>                  | 2                      | <1% | 1                       | <1% | 3              | <1% | 1.00                      |
| <b>Renal toxicity</b>                    | 2                      | <1% | 1                       | <1% | 3              | <1% | 1.00                      |
| <b>Tinnitus</b>                          | 2                      | <1% | 0                       | 0%  | 2              | <1% | 0.50                      |
| <b>Liver toxicity</b>                    | 0                      | 0%  | 2                       | <1% | 2              | <1% | 0.25                      |
| <b>Other toxicity</b>                    | 39                     | 9%  | 68                      | 15% | 107            | 12% | 0.0027                    |
| <b>Cycle of first G3/4/5 toxicity</b>    |                        |     |                         |     |                |     |                           |
| <b>1</b>                                 | 108                    | 24% | 77                      | 17% |                |     |                           |
| <b>2</b>                                 | 32                     | 7%  | 72                      | 16% |                |     |                           |
| <b>3</b>                                 |                        |     | 47                      | 11% |                |     |                           |
| <b>4</b>                                 |                        |     | 21                      | 5%  |                |     |                           |
| <b>None</b>                              | 306                    | 69% | 224                     | 51% |                |     |                           |

Note: Two patients in each arm did not receive any chemotherapy. A further three patients in each arm did not provide any toxicity data. If some toxicity data were provided, any missing toxicity data at that cycle are assumed to indicate that toxicity did not take place.

**Supplementary Table S5 Post-operative complications**

| Data                                        | CF<br>N=411 |     | ECX<br>N=387 |     | Total<br>N=798 |     |
|---------------------------------------------|-------------|-----|--------------|-----|----------------|-----|
|                                             | N           | %   | N            | %   | N              | %   |
| <b>Any complication</b>                     | 224         | 56% | 233          | 62% | 457            | 59% |
| <b>Respiratory</b>                          | 107         | 27% | 125          | 33% | 232            | 30% |
| <b>Infection</b>                            | 57          | 14% | 56           | 15% | 113            | 15% |
| <b>Cardiac</b>                              | 44          | 11% | 44           | 12% | 88             | 11% |
| <b>Anastomotic</b>                          | 45          | 11% | 38           | 10% | 83             | 11% |
| <b>Surgery related</b>                      | 36          | 9%  | 42           | 11% | 78             | 10% |
| <b>Haematological</b>                       | 18          | 5%  | 16           | 4%  | 34             | 4%  |
| <b>Thrombo-embolic</b>                      | 16          | 4%  | 17           | 5%  | 33             | 4%  |
| <b>Chylothorax</b>                          | 12          | 3%  | 15           | 4%  | 27             | 4%  |
| <b>Other</b>                                | 27          | 7%  | 27           | 7%  | 54             | 7%  |
| <b>Revisional operation</b>                 | 34          | 8%  | 32           | 8%  | 66             | 8%  |
| <b>Died within 90 days (based on dates)</b> | 21          | 5%  | 23           | 6%  | 44             | 6%  |
| <b>Died within 30 days (based on dates)</b> | 10          | 2%  | 11           | 3%  | 21             | 3%  |

Note: Thirteen patients in each arm provided no post-operative complication data. A further ten CF and nine ECX patients did not provide follow-up data on whether a revisional operation was required, despite reporting post-operative complications.

**Supplementary Table S6 Serious Adverse Events**

| Data                             | CF<br>N=451 |     | ECX<br>N=446 |     | Total<br>N=897 |     |
|----------------------------------|-------------|-----|--------------|-----|----------------|-----|
|                                  | N           | %   | N            | %   | N              | %   |
| <b>Any serious adverse event</b> | 73          | 16% | 108          | 24% | 181            | 20% |
| <b>Common body-systems</b>       |             |     |              |     |                |     |
| <b>Gastro-intestinal</b>         | 23          | 5%  | 32           | 8%  | 55             | 6%  |
| <b>Infection</b>                 | 15          | 3%  | 18           | 4%  | 33             | 4%  |
| <b>Cardiac</b>                   | 12          | 3%  | 8            | 2%  | 20             | 2%  |
| <b>Common events</b>             |             |     |              |     |                |     |
| <b>Diarrhoea</b>                 | 0           | 0%  | 14           | 3%  | 14             | 2%  |
| <b>Dysphagia</b>                 | 3           | 1%  | 10           | 2%  | 13             | 1%  |
| <b>Vomiting</b>                  | 11          | 2%  | 6            | 1%  | 17             | 2%  |
| <b>Pulmonary Embolism</b>        | 10          | 2%  | 16           | 4%  | 26             | 3%  |

Note: Only body-systems or serious adverse events reported by at least 10 patients in either arm are reported.



**Supplementary Table S7 Quality of life**

| Analysis point                | Time point                  | CF<br>Mean (sd), N | ECX<br>Mean (sd), N | All patients<br>Mean (sd), N | P-value |
|-------------------------------|-----------------------------|--------------------|---------------------|------------------------------|---------|
| <b>Global Quality of Life</b> |                             |                    |                     |                              |         |
| <b>Baseline</b>               | <b>Baseline</b>             | 76.3 (19.37), 358  | 75.7 (17.30), 367   | 76.0 (18.34), 725            |         |
| <b>Pre-surgery</b>            | <b>Baseline</b>             | 76.5 (19.50), 300  | 75.8 (17.66), 274   | 76.1 (18.63), 574            | 0.0582  |
|                               | <b>Pre-surgery</b>          | 66.5 (21.76), 300  | 62.8 (24.79), 274   | 64.7 (23.31), 574            |         |
|                               | <b>Change from baseline</b> | -10.0 (21.24), 300 | -13.0 (24.20), 274  | -11.4 (22.73), 574           |         |
| <b>3 months post-op</b>       | <b>Baseline</b>             | 77.0 (19.60), 177  | 76.9 (16.57), 162   | 76.9 (18.19), 339            | 0.4566  |
|                               | <b>3 months post-op</b>     | 60.1 (20.96), 177  | 61.7 (21.65), 162   | 60.9 (21.28), 339            |         |
|                               | <b>Change from baseline</b> | -16.9 (23.35), 177 | -15.2 (22.79), 162  | -16.1 (23.06), 339           |         |
| <b>12 months post-op</b>      | <b>Baseline</b>             | 80.5 (17.80), 107  | 77.7 (15.77), 101   | 79.2 (16.89), 208            | 0.6069  |
|                               | <b>12 months post-op</b>    | 70.0 (21.50), 107  | 67.3 (20.64), 101   | 68.7 (21.08), 208            |         |
|                               | <b>Change from baseline</b> | -10.5 (22.29), 107 | -10.4 (21.03), 101  | -10.5 (21.64), 208           |         |
| <b>24 months post-op</b>      | <b>Baseline</b>             | 80.1 (17.22), 67   | 79.1 (15.64), 75    | 79.6 (16.36), 142            | 0.1358  |
|                               | <b>24 months post-op</b>    | 73.8 (21.18), 67   | 68.3 (20.64), 75    | 70.9 (21.00), 142            |         |
|                               | <b>Change from baseline</b> | -6.3 (24.83), 67   | -10.8 (19.70), 75   | -8.7 (22.30), 142            |         |
| <b>Appetite Loss</b>          |                             |                    |                     |                              |         |
| <b>Baseline</b>               | <b>Baseline</b>             | 38.2 (28.37), 357  | 36.6 (27.62), 367   | 37.4 (27.98), 724            |         |
| <b>Pre-surgery</b>            | <b>Baseline</b>             | 38.3 (28.20), 299  | 35.9 (27.88), 274   | 37.1 (28.05), 573            | 0.2421  |
|                               | <b>Pre-surgery</b>          | 27.6 (26.37), 299  | 24.4 (26.07), 274   | 26.1 (26.25), 573            |         |
|                               | <b>Change from baseline</b> | -10.6 (28.64), 299 | -11.5 (29.42), 274  | -11.1 (28.99), 573           |         |
| <b>3 months post-op</b>       | <b>Baseline</b>             | 41.0 (29.20), 175  | 32.9 (25.84), 161   | 37.1 (27.90), 336            | 0.6320  |
|                               | <b>3 months post-op</b>     | 36.1 (24.78), 175  | 35.7 (24.24), 161   | 35.9 (24.49), 336            |         |
|                               | <b>Change from baseline</b> | -4.9 (34.64), 175  | 2.8 (29.65), 161    | -1.2 (32.53), 336            |         |
| <b>12 months post-op</b>      | <b>Baseline</b>             | 33.0 (27.88), 109  | 33.4 (26.42), 101   | 33.2 (27.12), 210            | 0.8226  |
|                               | <b>12 months post-op</b>    | 26.3 (21.67), 109  | 25.7 (20.72), 101   | 26.0 (21.17), 210            |         |
|                               | <b>Change from baseline</b> | -6.6 (30.87), 109  | -7.7 (29.78), 101   | -7.1 (30.28), 210            |         |
| <b>24 months post-op</b>      | <b>Baseline</b>             | 35.7 (30.25), 69   | 30.6 (26.19), 75    | 33.0 (28.23), 144            |         |

| Analysis point           | Time point                                                     | CF<br>Mean (sd), N                                          | ECX<br>Mean (sd), N                                           | All patients<br>Mean (sd), N                                | P-value |
|--------------------------|----------------------------------------------------------------|-------------------------------------------------------------|---------------------------------------------------------------|-------------------------------------------------------------|---------|
|                          | <b>24 months post-op<br/>Change from baseline</b>              | 22.1 (22.77), 69<br>-13.65 (34.27), 69                      | 22.9 (23.41), 75<br>-7.7 (30.50), 75                          | 22.5 (23.03), 144<br>-10.5 (32.39), 144                     | 0.6530  |
| <b>Reflux</b>            |                                                                |                                                             |                                                               |                                                             |         |
| <b>Baseline</b>          | <b>Baseline</b>                                                | 16.0 (22.15), 359                                           | 18.7 (25.74), 367                                             | 17.3 (24.05), 726                                           |         |
| <b>Pre-surgery</b>       | <b>Baseline<br/>Pre-surgery<br/>Change from baseline</b>       | 16.6 (22.67), 302<br>14.1 (21.08), 302<br>-2.5 (24.47), 302 | 19.2 (26.01), 274<br>15.1 (22.07), 274<br>-4.0 (27.07), 274   | 17.8 (24.33), 576<br>14.6 (21.55), 576<br>-3.2 (25.73), 576 | 0.8930  |
| <b>3 months post-op</b>  | <b>Baseline<br/>3 months post-op<br/>Change from baseline</b>  | 16.0 (21.93), 177<br>24.0 (27.86), 177<br>8.0 (31.08), 177  | 16.5 (22.66), 159<br>21.1 (24.70), 159<br>4.6 (29.46), 159    | 16.2 (22.24), 336<br>22.6 (26.41), 336<br>6.4 (30.33), 336  | 0.2761  |
| <b>12 months post-op</b> | <b>Baseline<br/>12 months post-op<br/>Change from baseline</b> | 16.4 (21.51), 109<br>25.5 (26.89), 109<br>9.2 (27.92), 109  | 14.9 (22.35), 101<br>27.4 (29.21), 101<br>12.5 (33.20), 101   | 15.6 (21.88), 210<br>26.4 (27.98), 210<br>10.8 (30.54), 210 | 0.5254  |
| <b>24 months post-op</b> | <b>Baseline<br/>24 months post-op<br/>Change from baseline</b> | 13.8 (23.21), 69<br>23.4 (25.46), 69<br>9.7 (33.3), 69      | 17.3 (25.74), 76<br>29.8 (27.26), 76<br>12.5 (31.87), 76      | 15.6 (24.55), 145<br>26.8 (26.52), 145<br>11.1 (32.46), 145 | 0.1930  |
| <b>Pain</b>              |                                                                |                                                             |                                                               |                                                             |         |
| <b>Baseline</b>          | <b>Baseline</b>                                                | 19.3 (19.15), 359                                           | 21.3 (21.72), 367                                             | 20.3 (20.50), 726                                           |         |
| <b>Pre-surgery</b>       | <b>Baseline<br/>Pre-surgery<br/>Change from baseline</b>       | 19.8 (19.25), 302<br>13.1 (16.72), 302<br>-6.7 (20.24), 302 | 21.4 (21.37), 274<br>12.0 (17.43), 274<br>-9.4 (22.23), 274   | 20.5 (20.28), 576<br>12.6 (17.06), 576<br>-8.0 (21.23), 576 | 0.2369  |
| <b>3 months post-op</b>  | <b>Baseline<br/>3 months post-op<br/>Change from baseline</b>  | 18.5 (18.72), 177<br>19.7 (19.59), 177<br>1.2 (23.35), 177  | 18.4 (20.30), 161<br>17.56 (17.19), 161<br>-0.86 (19.57), 161 | 18.5 (19.46), 338<br>18.7 (18.49), 338<br>0.2 (21.62), 338  | 0.2628  |
| <b>12 months post-op</b> | <b>Baseline<br/>12 months post-op</b>                          | 16.1 (16.94), 109<br>15.2 (18.25), 109                      | 18.6 (19.82), 101<br>16.6 (21.17), 101                        | 17.3 (18.38), 210<br>15.8 (19.67), 210                      | 0.8985  |

| Analysis point           | Time point                  | CF<br>Mean (sd), N | ECX<br>Mean (sd), N | All patients<br>Mean (sd), N | P-value |
|--------------------------|-----------------------------|--------------------|---------------------|------------------------------|---------|
|                          | <b>Change from baseline</b> | -0.9 (21.81), 109  | -2.0 (20.12), 101   | -1.5 (20.97), 210            |         |
| <b>24 months post-op</b> | <b>Baseline</b>             | 15.6 (19.09), 69   | 17.8 (20.05), 76    | 16.8 (19.56), 145            | 0.8187  |
|                          | <b>24 months post-op</b>    | 14.0 (17.64), 69   | 14.3 (22.06), 76    | 14.2 (20.01), 145            |         |
|                          | <b>Change from baseline</b> | -1.6 (19.46), 69   | -3.5 (22.16), 76    | -2.6 (20.87), 145            |         |
| <b>Dysphagia</b>         |                             |                    |                     |                              |         |
| <b>Baseline</b>          | <b>Baseline</b>             | 73.7 (25.83), 359  | 74.1 (25.55), 367   | 73.9 (25.67), 726            | 0.0173  |
| <b>Pre-surgery</b>       | <b>Baseline</b>             | 73.7 (25.75), 301  | 75.1 (25.01), 274   | 74.4 (25.39), 575            |         |
|                          | <b>Pre-surgery</b>          | 79.4 (23.73), 301  | 84.4 (24.25), 274   | 81.8 (24.08), 575            |         |
|                          | <b>Change from baseline</b> | 5.7 (28.40), 301   | 9.2 (28.00), 274    | 7.4 (28.24), 575             |         |
| <b>3 months post-op</b>  | <b>Baseline</b>             | 73.0 (26.47), 177  | 79.4 (22.68), 161   | 76.1 (24.91), 338            | 0.8142  |
|                          | <b>3 months post-op</b>     | 81.6 (23.06), 177  | 82.1 (23.27), 161   | 81.8 (23.12), 338            |         |
|                          | <b>Change from baseline</b> | 8.6 (32.25), 177   | 2.6 (29.22), 161    | 5.8 (30.94), 338             |         |
| <b>12 months post-op</b> | <b>Baseline</b>             | 79.3 (25.19), 109  | 77.6 (22.78), 100   | 78.5 (24.02), 209            | 0.3176  |
|                          | <b>12 months post-op</b>    | 88.4 (17.70), 109  | 85.3 (24.76), 100   | 86.9 (21.38), 209            |         |
|                          | <b>Change from baseline</b> | 9.1 (27.48), 109   | 7.7 (32.54), 100    | 8.5 (29.94), 209             |         |
| <b>24 months post-op</b> | <b>Baseline</b>             | 79.4 (25.16), 69   | 78.8 (23.53), 76    | 79.1 (24.23), 145            | 0.5183  |
|                          | <b>24 months post-op</b>    | 87.1 (23.77), 69   | 89.3 (19.41), 76    | 88.3 (21.55), 145            |         |
|                          | <b>Change from baseline</b> | 7.7 (33.46), 69    | 10.5 (25.65), 76    | 9.2 (29.55), 145             |         |

Note: Quality of life data are collected using the EORTC QLQ-C30 and OES-18 questionnaires.

Note: Treatment groups are compared using analysis of variance, with adjustment for baseline values.

**Supplementary Table S8 Survival times from planned sub-group analyses.**

|                |               | CF<br>(N=451) |                    | ECX<br>(N=446) |                    |
|----------------|---------------|---------------|--------------------|----------------|--------------------|
|                |               | N             | Med OS (95% CI)    | N              | Med OS (95% CI)    |
| <b>Sex</b>     | <b>Male</b>   | 412           | 2.00 (1.70, 2.28)  | 398            | 2.11 (1.93, 2.36)  |
|                | <b>Female</b> | 39            | 4.03 (1.50, Undef) | 48             | 2.63 (1.55, Undef) |
| <b>Age</b>     | <b>&lt;60</b> | 171           | 2.42 (1.71, 3.67)  | 172            | 2.17 (1.85, 2.64)  |
|                | <b>60-69</b>  | 212           | 1.80 (1.52, 2.11)  | 192            | 2.33 (1.93, 3.27)  |
|                | <b>70+</b>    | 68            | 2.07 (1.70, 2.68)  | 82             | 1.80 (1.59, 2.25)  |
| <b>WHO PS</b>  | <b>0</b>      | 311           | 2.28 (2.00, 2.94)  | 292            | 2.28 (1.98, 3.03)  |
|                | <b>1</b>      | 140           | 1.50 (1.23, 1.90)  | 154            | 1.80 (1.59, 2.33)  |
| <b>T-stage</b> | <b>T2</b>     | 47            | 2.00 (1.50, 4.48)  | 40             | 2.36 (1.64, 4.56)  |
|                | <b>T3</b>     | 386           | 2.11 (1.75, 2.42)  | 389            | 2.10 (1.85, 2.33)  |
|                | <b>T4</b>     | 15            | 1.65 (0.58, 2.06)  | 12             | 3.14 (0.80, Undef) |
| <b>N-stage</b> | <b>N0</b>     | 97            | 1.75 (1.28, 2.66)  | 97             | 2.89 (2.22, Undef) |
|                | <b>N1</b>     | 350           | 2.05 (1.80, 2.40)  | 345            | 2.02 (1.82, 2.31)  |

Note: WHO PS = World Health Organisation Performance Status.

Note: T-stage and N-stage are as reported at time of randomisation.

Note: Undef = upper or lower limit of confidence interval is not defined.

Note: P-values for heterogeneity of treatment effect are 0.69 for sex; 0.05 for age; 0.46 for WHO PS; 0.11 for T-stage; and 0.05 for N-stage.

**Supplementary Table S9 Survival times from unplanned sub-group analyses.**

|                              |             | CF<br>(N=451) |                   | ECX<br>(N=446) |                    |
|------------------------------|-------------|---------------|-------------------|----------------|--------------------|
|                              |             | N             | Med OS (95% CI)   | N              | Med OS (95% CI)    |
| <b>Year of randomisation</b> | <b>2005</b> | 42            | 1.67 (1.30, 2.42) | 44             | 2.78 (1.34, 4.54)  |
|                              | <b>2006</b> | 74            | 1.44 (1.03, 2.09) | 73             | 2.23 (1.63, Undef) |
|                              | <b>2007</b> | 66            | 1.59 (1.33, 2.02) | 63             | 2.64 (1.74, 4.28)  |
|                              | <b>2008</b> | 81            | 2.51 (1.51, 4.55) | 82             | 2.03 (1.64, 3.42)  |
|                              | <b>2009</b> | 67            | 3.02 (1.61, 4.96) | 67             | 1.73 (1.34, 2.23)  |
|                              | <b>2010</b> | 82            | 2.26 (1.80, 4.03) | 81             | 2.00 (1.63, 2.62)  |
|                              | <b>2011</b> | 39            | 1.88 (1.21, 3.33) | 36             | 3.14 (1.62, Undef) |
|                              |             |               |                   |                |                    |
| <b>PET scan</b>              | <b>Yes</b>  | 271           | 2.28 (2.00, 2.68) | 270            | 1.88 (1.70, 2.18)  |
|                              | <b>No</b>   | 179           | 1.64 (1.31, 2.06) | 175            | 2.64 (2.23, 3.47)  |

Note: Undef = upper or lower limit of confidence interval is not defined.

Note: P-values for heterogeneity of treatment effect are 0.0004 for year of randomisation; and 0.0008 for use of PET scan.

Note: Use of PET scan by year of randomisation: 12% (2005), 18% (2006), 40% (2007), 77% (2008), 84% (2009), 90% (2010), 89% (2011).

**Supplementary Figure S1 Disease-free survival**

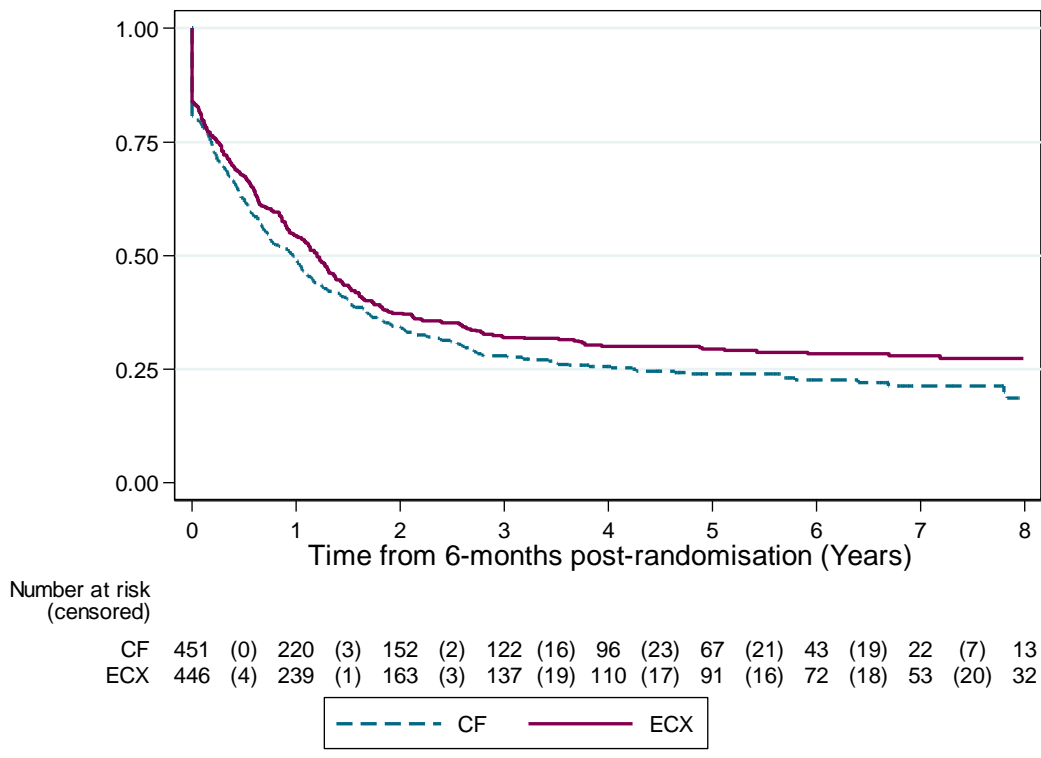

**Supplementary Figure S2 Progression-free survival**

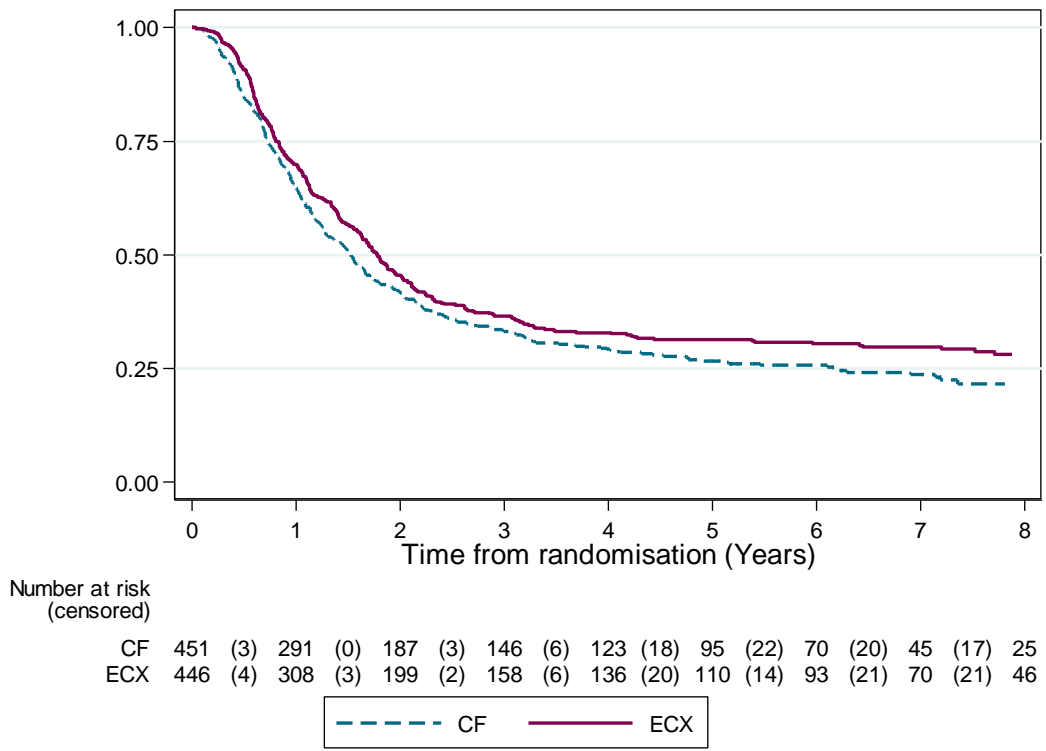

**Supplementary Figure S3 Post-operative survival according to local Mandard TRG assessment.**

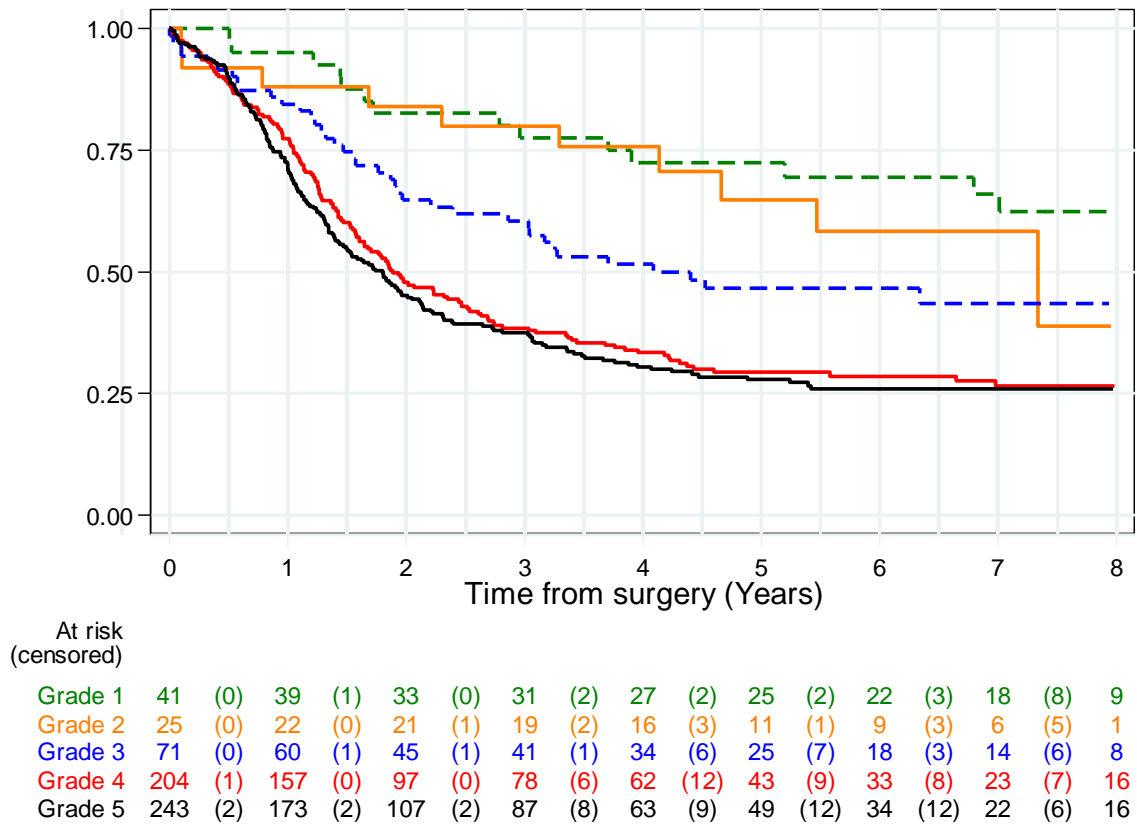

Note: HR (95% CI), p-value for comparison with grade 1 or 2 is 1.77 (1.06, 2.96), p=0.028 for grade 3, and 3.04 (2.01, 4.61), p<0.0001 for grade 4 or 5.
